# Supplementary material for: Biosynthesis of 2-furylhydroxymethylketone, an intermediate of cefuroxime, from furfural and formaldehyde using a ThDP-dependent enzyme
Source: Royal Society of Chemistry journal article supplement (doi:10.1039/d3gc00848g), 2023-01-01
Supplement: d3gc00848g1.pdf [file d3gc00848g1.pdf]

## Supporting Information

# Biosynthesis of 2-furylhydroxymethylketone, an intermediate of cefuroxime, from furfural and formaldehyde using a ThDP-dependent enzyme

Xianghe Zhang<sup>a</sup>, Hao Wei<sup>a</sup>, Xinlin Wei<sup>a</sup>, Tengteng Qi<sup>a</sup>, Xinrui Zong<sup>a</sup>, Zixi Liu<sup>a</sup>, Jie Qin<sup>a</sup>, Xiuzhen Gao<sup>a\*</sup>, Gengxiu Zheng<sup>b\*</sup>, Qinyuan Ma<sup>a\*</sup>

<sup>a</sup> School of Life Science and Medicine, Shandong University of Technology, Zibo 255000, China

<sup>b</sup> School of Chemistry and Chemical Engineering, University of Jinan, Jinan 250022, China.

\* Corresponding authors

## Supporting Figures

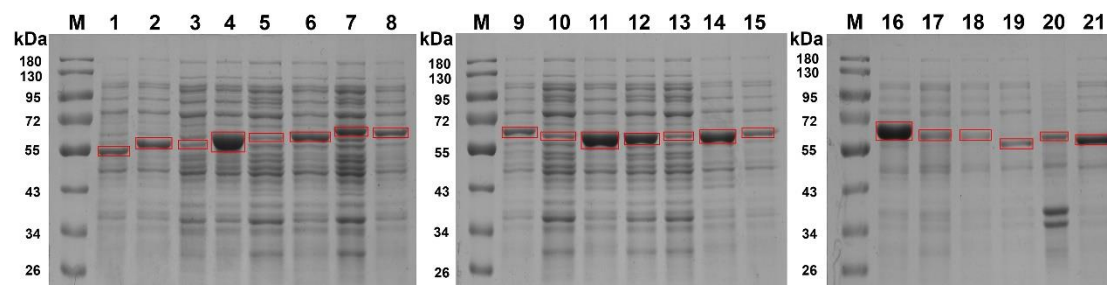

**Figure S1** SDS-PAGE analysis of ThDP-dependent enzymes' supernatants. Lane M: protein marker; Lane 1-21 are corresponding to ThDP-1 to ThDP-21.

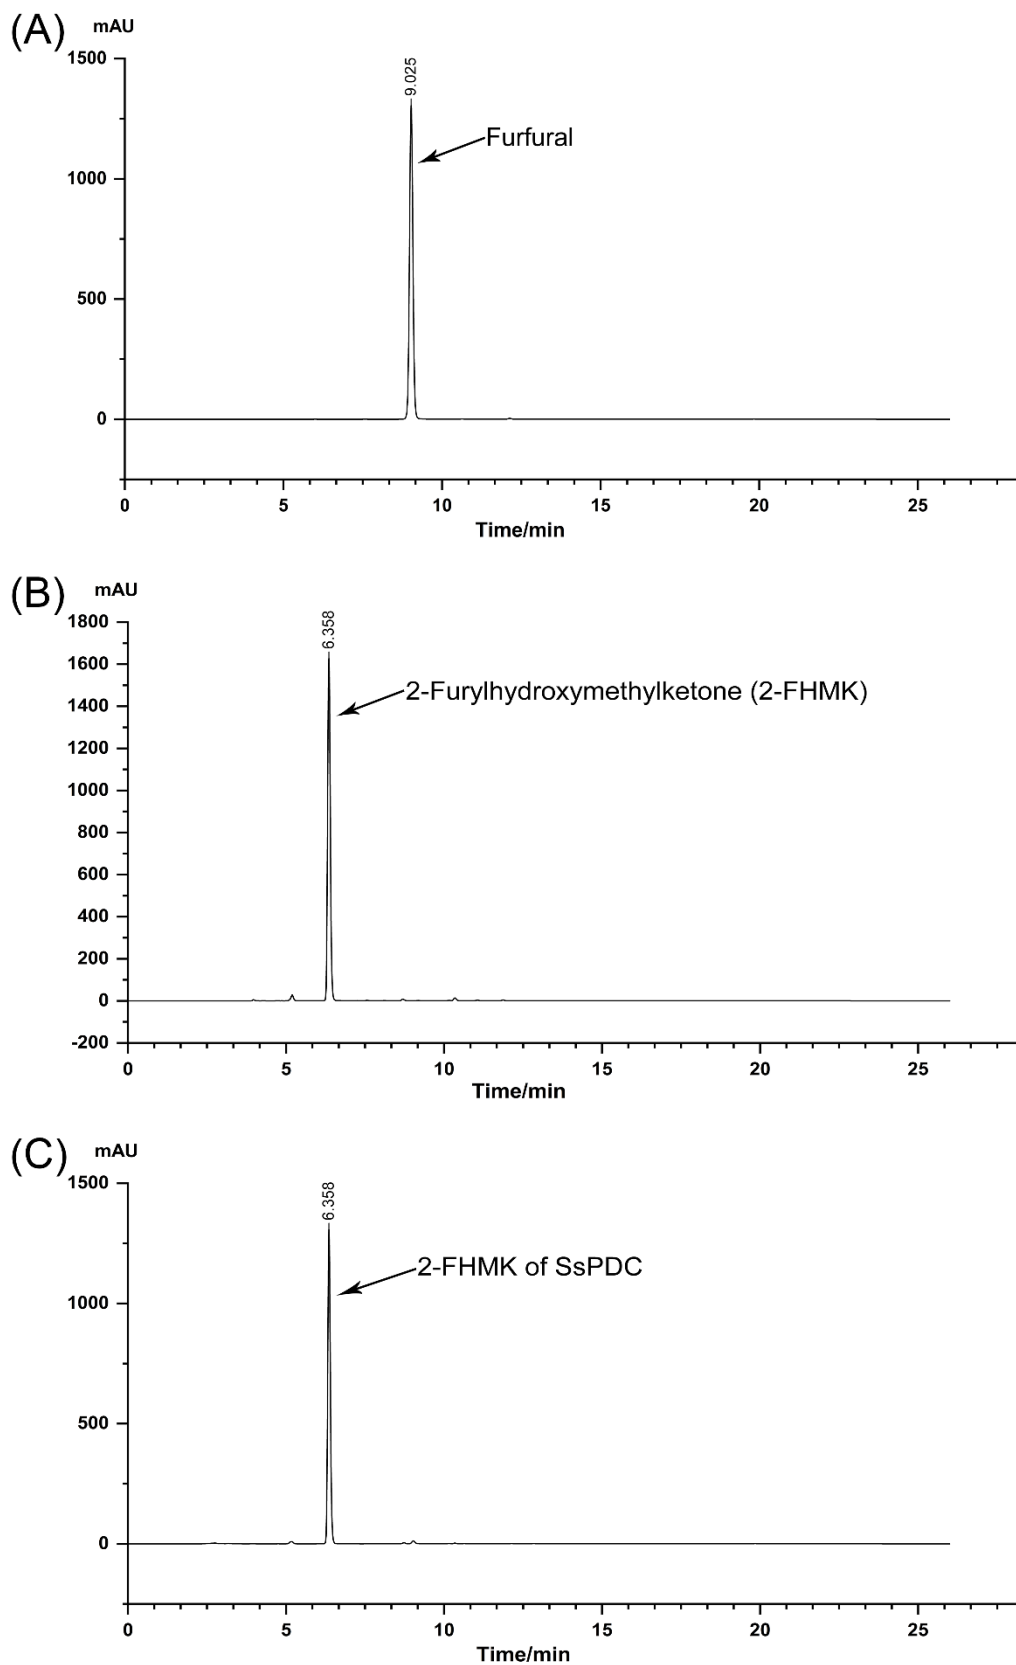

**Figure S2** HPLC chromatogram of furfural and 2-FHMK. (A) HPLC chromatogram of furfural standard. (B) HPLC chromatogram of 2-FHMK standard. (C) HPLC chromatogram of sample from biotransformation of furfural to 2-FHMK with SsPDC.

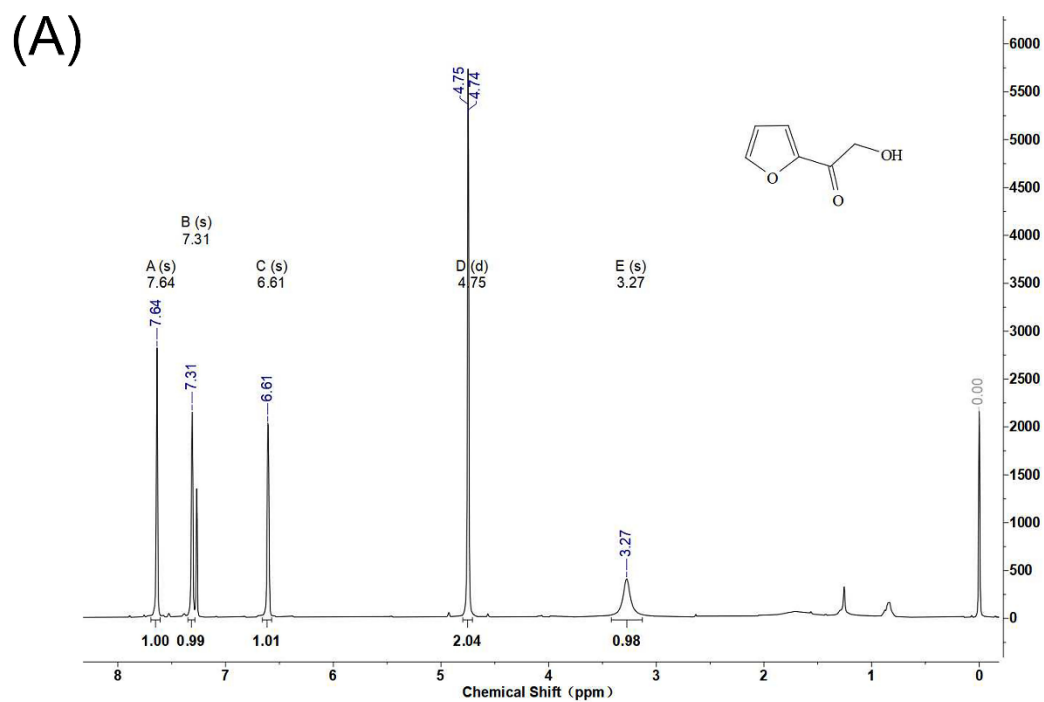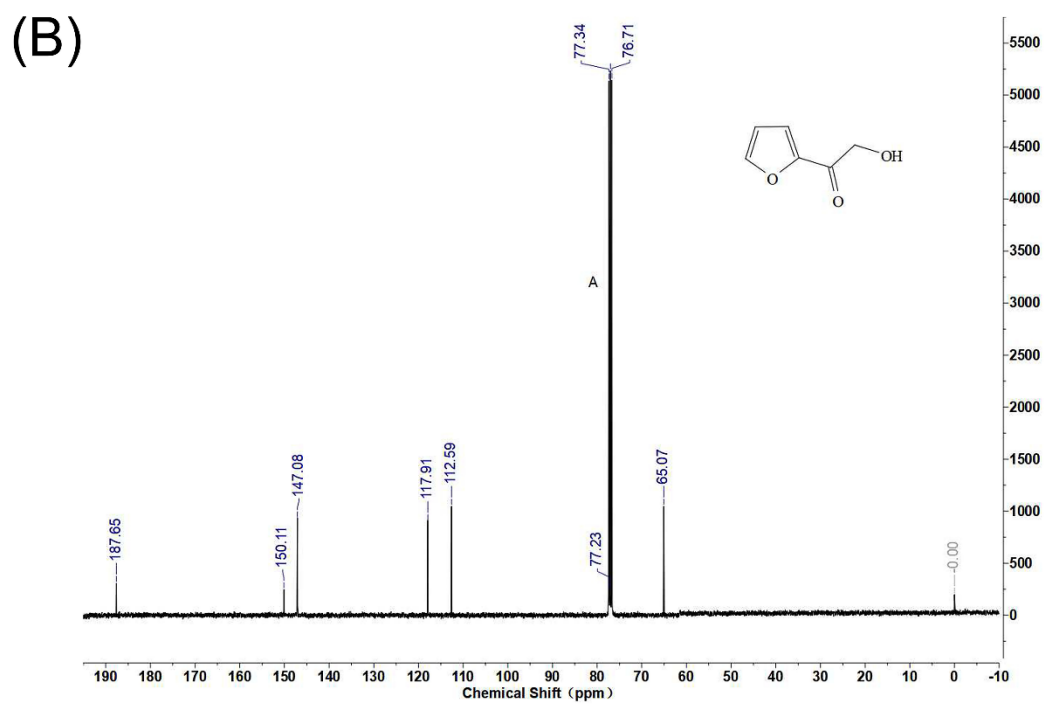

**Figure S3** NMR spectra of 2-FHMK standard. (A)  $^1\text{H}$ -NMR spectra of 2-FHMK standard. (B)  $^{13}\text{C}$ -NMR spectra of 2-FHMK standard.

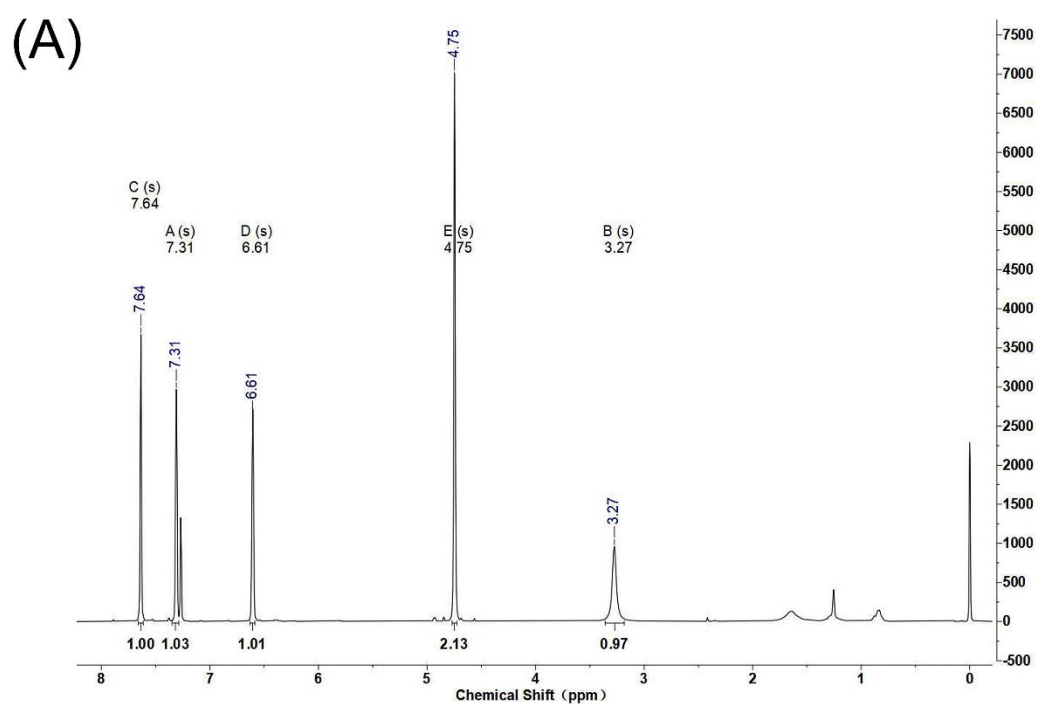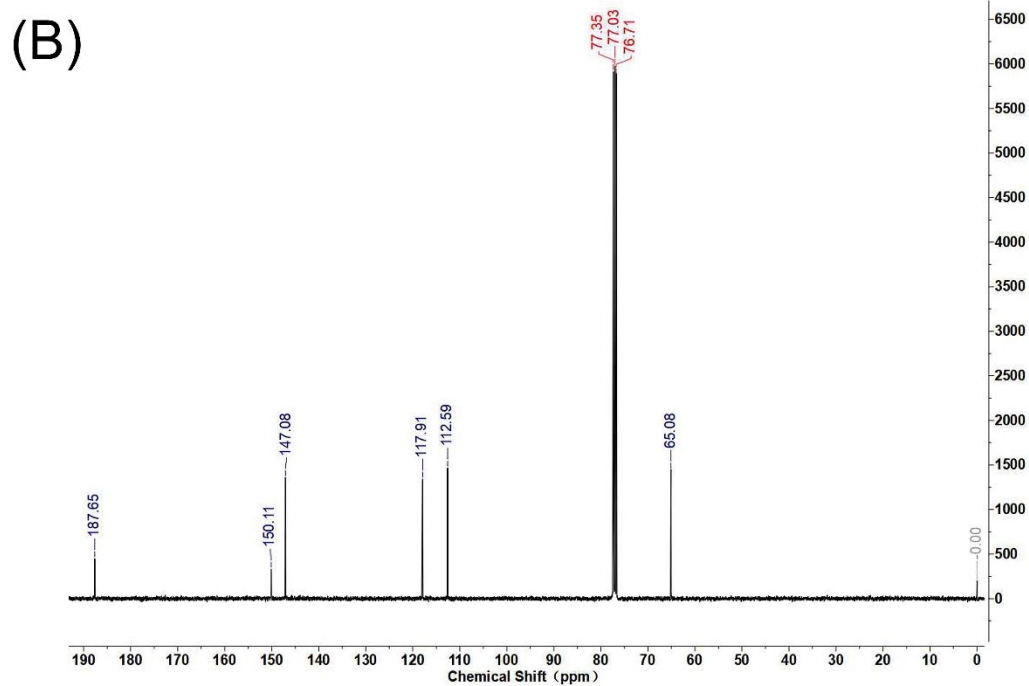

**Figure S4** NMR spectra of product 2-FHMK catalyzed by SsPDC. (A)<sup>1</sup>H-NMR spectra of product 2-FHMK catalyzed by cell-free extracts of SsPDC. (B)<sup>13</sup>C-NMR spectra of product 2-FHMK catalyzed by cell-free extracts of SsPDC.
